# Supplementary material
Source: PubMed Central journal article supplement (PMC5993197)
Supplement: NIHMS970543-supplement-supp.pdf [file NIHMS970543-supplement-supp.pdf]

Supplementary Material to Zhai et al. “NMMHC IIA inhibition impedes tissue factor expression and venous thrombosis via Akt/GSK3 $\beta$ -NF- $\kappa$ B signalling pathways in the endothelium” (Thromb Haemost 2015; 114.1)

Supplementary figure 1.tif

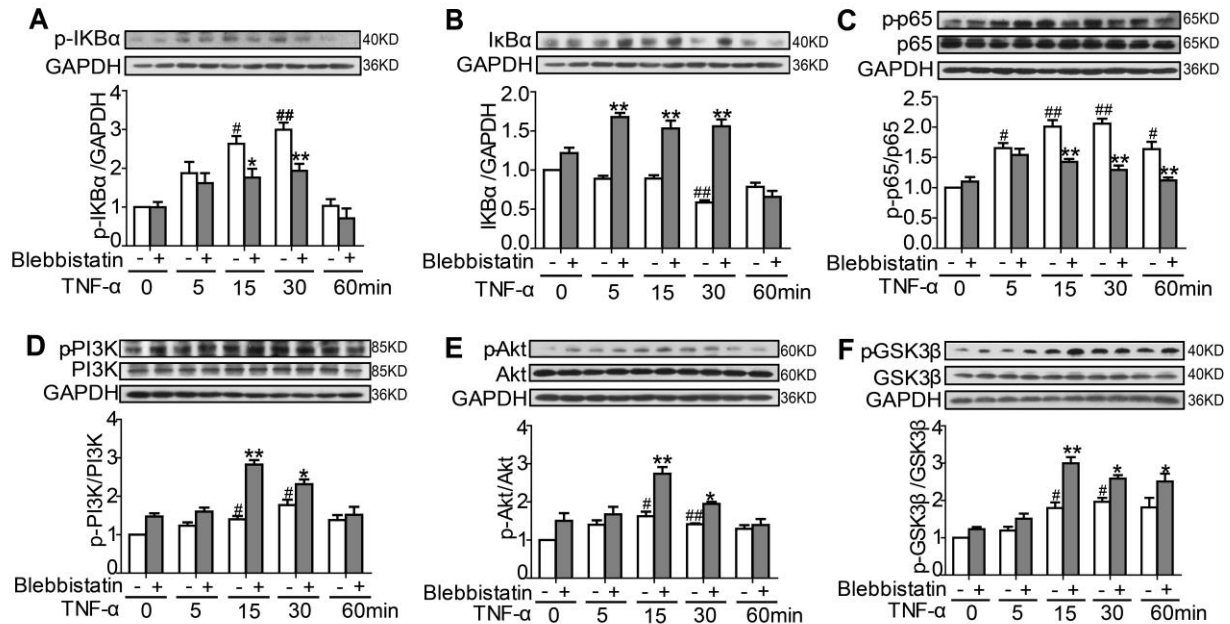

**Suppl. Figure 1: Blebbistatin downregulated NF- $\kappa$ B pathway and activated Akt/GSK3 $\beta$  signaling pathway induced by TNF- $\alpha$  in the endothelial cells.** EA.hy926 endothelial cells were treated with TNF- $\alpha$  (10 ng/ml) with or without blebbistatin (1  $\mu$ M) for the indicated time. **A-C)** Total and phosphorylated forms of I $\kappa$ B $\alpha$  and p65 were examined by western blotting.  $^{\#}P < 0.05$ ,  $^{\#\#}P < 0.01$  vs the unstimulated group at 0 min;  $^*P < 0.05$ ,  $^{**}P < 0.01$  vs TNF- $\alpha$  stimulated group at certain time. **D-F)** PI3K, Akt, GSK3 $\beta$  and their phosphorylated forms were examined by western blotting.  $^{\#}P < 0.05$ ,  $^{\#\#}P < 0.01$  vs the unstimulated group at 0 min;  $^*P < 0.05$ ,  $^{**}P < 0.01$  vs TNF- $\alpha$  model group at certain time.

Supplementary Material to Zhai et al. “NMMHC IIA inhibition impedes tissue factor expression and venous thrombosis via Akt/GSK3 $\beta$ -NF- $\kappa$ B signalling pathways in the endothelium” (Thromb Haemost 2015; 114.1)

Supplementary figure 2.tif

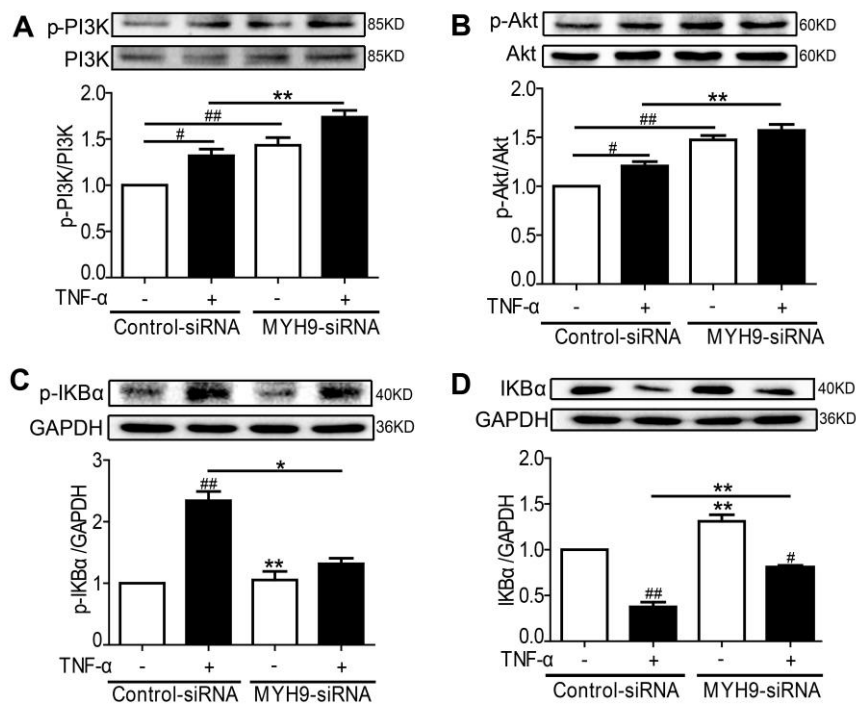

**Suppl. Figure 2: NMMHC IIA specific knock-down facilitated TNF- $\alpha$  induced PI3K/Akt activation and attenuated NF- $\kappa$ B in the endothelial cells.** At 48 h post-transfection, EA.hy926 endothelial cells were treated with 10 ng/ml TNF- $\alpha$  for 15 min or 30 min. **A-B)** Total and phosphorylated PI3K, Akt were analyzed by western blotting. **C-D)** Total and phosphorylated I $\kappa$ B $\alpha$  were analyzed by western blotting. Densitometry quantification represents data from 3 individual experiments. ## $P$ <0.01 vs control-siRNA group; \*\* $P$ <0.01 vs TNF- $\alpha$  stimulation group.

Supplementary Material to Zhai et al. “NMMHC IIA inhibition impedes tissue factor expression and venous thrombosis via Akt/GSK3 $\beta$ -NF- $\kappa$ B signalling pathways in the endothelium” (Thromb Haemost 2015; 114.1)

Supplementary figure 3.tif

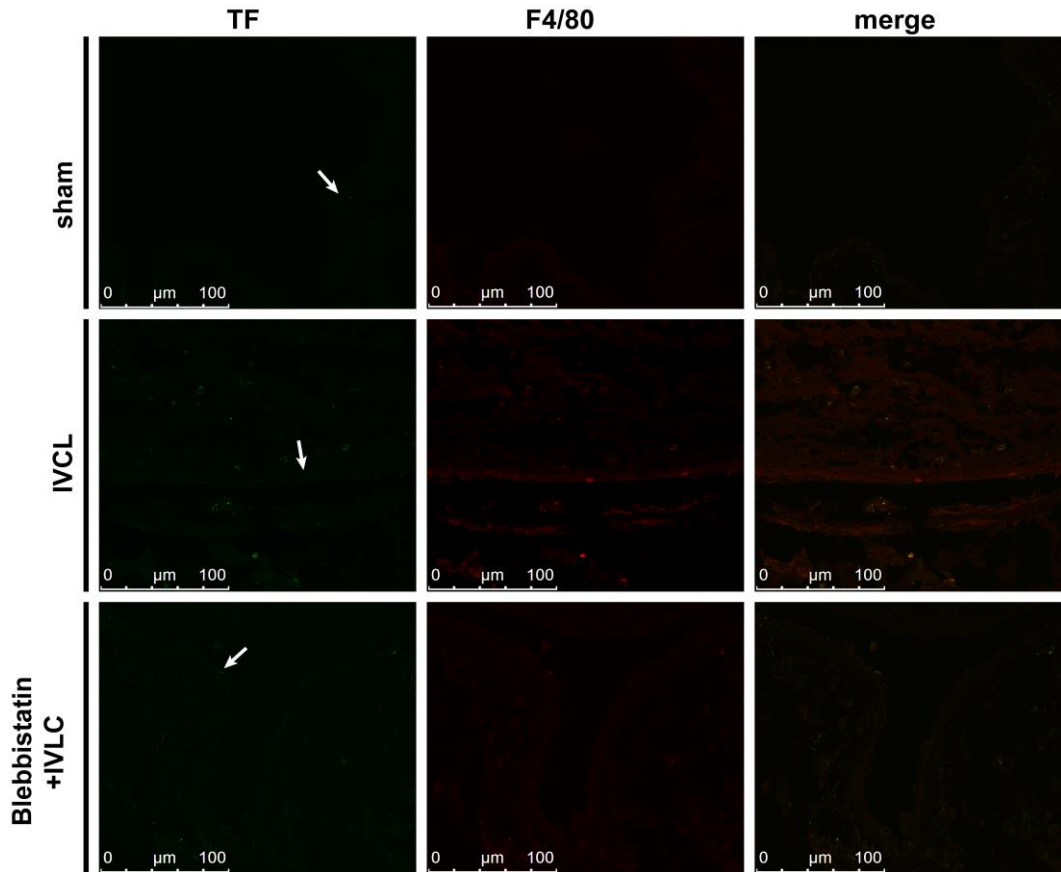

**Suppl. Figure 3: Double staining for TF and a macrophage marker.** IVC sections were immunostained with a combination of anti-TF pAbs (green) and anti-F4/80 pAbs (red). Images were digitally merged. Representative results are shown. Bar, 100 μm. (arrows indicate vessel wall).

Supplementary Material to Zhai et al. “NMMHC IIA inhibition impedes tissue factor expression and venous thrombosis via Akt/GSK3 $\beta$ -NF- $\kappa$ B signalling pathways in the endothelium” (Thromb Haemost 2015; 114.1)

---

**Supplementary figure 4.tif**

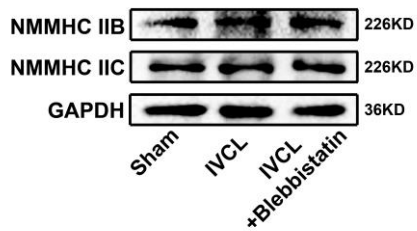

**Suppl. Figure 4: Blebbistatin barely affected NMMHC IIB and NMMHC IIC expression in DVT mice.** At 48 h after IVCL, IVCs were harvested. NMMHC IIB and NMMHC IIC were analyzed by western blotting.

Supplementary Material to Zhai et al. “NMMHC IIA inhibition impedes tissue factor expression and venous thrombosis via Akt/GSK3 $\beta$ -NF- $\kappa$ B signalling pathways in the endothelium” (Thromb Haemost 2015; 114.1)

Supplementary figure 5 . tif

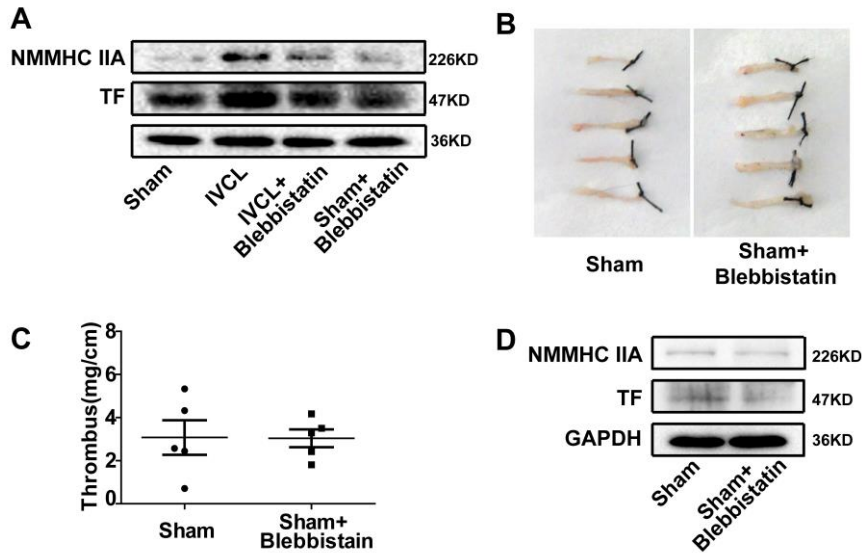

**Suppl. Figure 5: Blebbistatin pretreatment alone had no obvious difference from the sham group in DVT mice.** At 48 h after IVCL, IVCs were harvested. **A)** TF and NMMHC IIA were analyzed by western blotting. **B-C)** The thrombosed inferior vena cava was weighed and the length of thrombus was measured. The size of the thrombus was quantified as mg/cm. Five representative thrombosed inferior vena cava in each group and the quantitative data of thrombosed inferior vena cava are shown. **D)** TF and NMMHC IIA were analyzed by western blotting.

Supplementary Material to Zhai et al. “NMMHC IIA inhibition impedes tissue factor expression and venous thrombosis via Akt/GSK3 $\beta$ -NF- $\kappa$ B signalling pathways in the endothelium” (Thromb Haemost 2015; 114.1)

---

**Supplementary figure 6.tif**

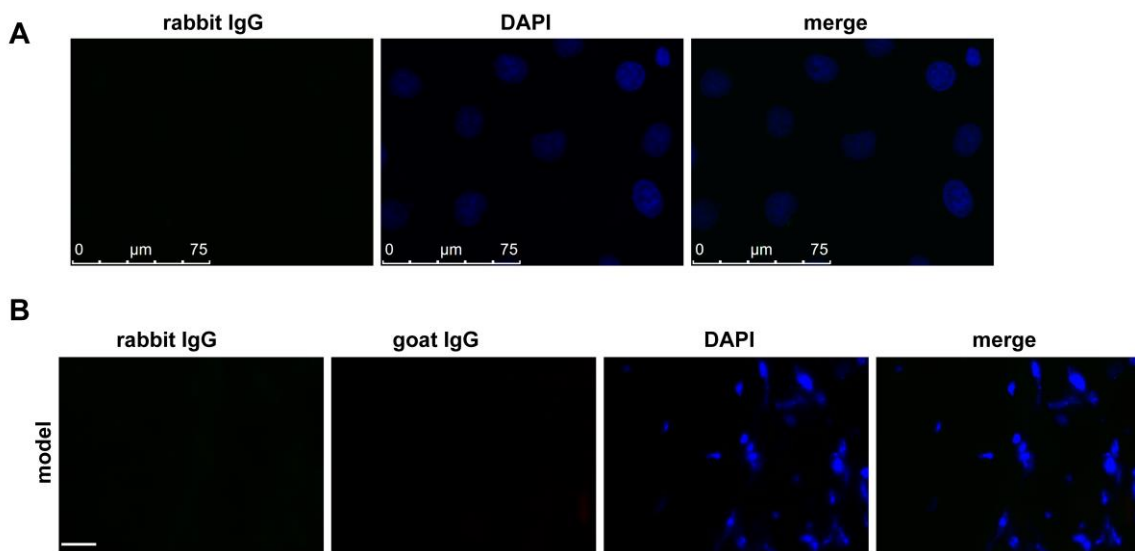

**Suppl. Figure 6: Staining controls.** A) Staining controls for endothelial cells; B) Staining controls for IVC sections. Bar, 75  $\mu$ m.
